# Supplementary material for: A putative de novo evolved gene required for spermatid chromatin condensation in Drosophila melanogaster
Source: PubMed Central journal article supplement (PMC8445463; doi:10.1371/journal.pgen.1009787), 2021-09-03

**Primers:**

*atlas*

*RpL32*

**Template:**

Cont GD KK gDNA H<sub>2</sub>O

Cont GD KK gDNA H<sub>2</sub>O

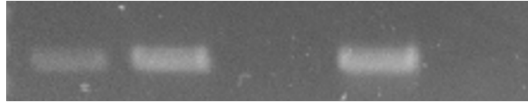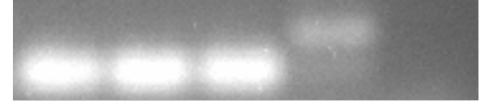

Supplement: pgen.1009787.s001.pdf [file pgen.1009787.s001.pdf]
