# Supplementary material for: A putative de novo evolved gene required for spermatid chromatin condensation in Drosophila melanogaster
Source: PubMed Central journal article supplement (PMC8445463; doi:10.1371/journal.pgen.1009787), 2021-09-03
Supplement: pgen.1009787.s002.pdf [file pgen.1009787.s002.pdf]

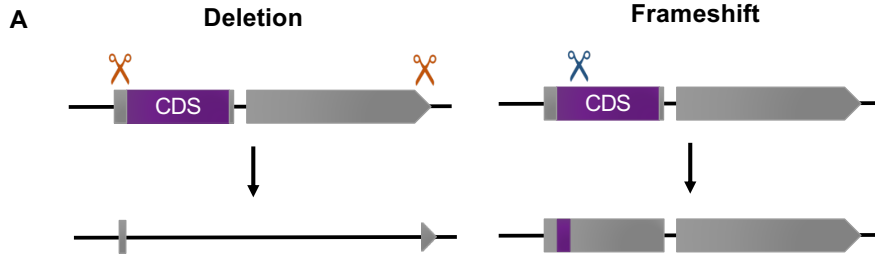

**B**

|       |                                                                |     |
|-------|----------------------------------------------------------------|-----|
| WT    | GATAATAATATTATCAAAAACGTCAGAGTATTATCGTATTGTATATTTCCAAATTACTT    | 60  |
| at152 | GATAATAATATTATCAAAAACGTCAGAGTATTATCGTATTGTATATTTCCAAATTACTT    | 60  |
| at162 | GATAATAATATTATCAAAAACGTCAGAGTATTATCGTATTGTATATTTCCAAATTACTT    | 60  |
| at186 | GATAATAATATTATCAAAAACGTCAGAGTATTATCGTATTGTATATTTCCAAATTACTT    | 60  |
|       |                                                                |     |
| WT    | GTTATCACATCGAGTAAATCGGACGCAAAGGCCACAAGACTAGAA-----             | 105 |
| at152 | GTTATCACATCGAGTAAATCGGACGCAAAGGCCACAAGA-----ARAGGAAAGCCCTTC    | 115 |
| at162 | GTTATCACATCGAGTAAATCGGACGCAAAGGCCTTT-----                      | 96  |
| at186 | GTTATCACATCGAGTAAATCGGACGCAAAGGCCACAAGA-----A-----             | 100 |
|       |                                                                |     |
| WT    | -----GGAAAGTTAAAGTCCACTCGAAGGTCCATCCTCCTCAGAAAATTAAGCG         | 155 |
| at152 | TTTTTAAGAAAGGAAAGTTAAAGTCCACTCGAAGGTCCATCCTCCTCAGAAAATTAAGCG   | 175 |
| at162 | GAAGTTAAAGTCCACTCGAAGGTCCATCCTCCTCAGAAAATTAAGCG                | 145 |
| at186 | -----GGAAAGTTAAAGTCCAATCGAAGGTCCATCCTCCTCAGAAAATTAAGCG         | 150 |
|       |                                                                |     |
| WT    | AAGCTGCCGAAAAGAGATAAACGTAGCACACTTCGTCCCAAGATTAATAATTCGAAGGTT   | 215 |
| at152 | AAGCTGCCGAAAAGAGATAAACGTAGCACACTTCGTCCCAAGATTAATAATTCGAAGGTT   | 235 |
| at162 | AAGCTGCCGAAAAGAGATAAACGTAGCACACTTCGTCCCAAGATTAATAATTCGAAGGTT   | 205 |
| at186 | AAGCTGCCGAAAAGAGATAAACGTAGCACACTTCGTCCCAAGATTAATAATTCGAAGGTT   | 210 |
|       |                                                                |     |
| WT    | TTTACAGTGAACCTGCTGCAAGTACAAGATCCGTTTCGAGACCCATGAGGCGCAATCAGTGC | 275 |
| at152 | TTTACAGTGAACCTGCTGCAAGTACAAGATCCGTTTCGAGACCCATGAGGCGCAATCAGTGC | 295 |
| at162 | TTTACAGTGAACCTGCTGCAAGTACAAGATCCGTTTCGAGACCCATGAGGCGCAATCAGTGC | 265 |
| at186 | TTTACAGTGAACCTGCTGCAAGTACAAGATCCGTTTCGAGACCCATGAGGCGCAATCAGTGC | 270 |
|       |                                                                |     |
| WT    | AACCTGGCCACCCAGTGCCCTCCACACGGTCGCCATCGCCCGTCTGTGCCGCTCCTG      | 335 |
| at152 | AACCTGGCCACCCAGTGCCCTCCACACGGTCGCCATCGCCCGTCTGTGCCGCTCCTG      | 355 |
| at162 | AACCTGGCCACCCAGTGCCCTCCACACGGTCGCCATCGCCCGTCTGTGCCGCTCCTG      | 325 |
| at186 | AACCTGGCCACCCAGTGCCCTCCACACGGTCGCCATCGCCCGTCTGTGCCGCTCCTG      | 330 |
|       |                                                                |     |
| WT    | CATCATCCTGTCCGGCGGAAGGTGGTCCATATGCCGGAAACCGTGGTCAATGCACATGCGG  | 395 |
| at152 | CATCATCCTGTCCGGCGGAAGGTGGTCCATATGCCGGAAACCGTGGTCAATGCACATGCGG  | 415 |
| at162 | CATCATCCTGTCCGGCGGAAGGTGGTCCATATGCCGGAAACCGTGGTCAATGCACATGCGG  | 385 |
| at186 | CATCATCCTGTCCGGCGGAAGGTGGTCCATATGCCGGAAACCGTGGTCAATGCACATGCGG  | 390 |
|       |                                                                |     |
| WT    | AATATGGAGGACGCCCGCGAGTGGCGGTTAAGCACAGAAGAACCCTTATTCAAACCCAT    | 455 |
| at152 | AATATGGAGGACGCCCGCGAGTGGCGGTTAAGCACAGAAGAACCCTTATTCAAACCCAT    | 475 |
| at162 | AATATGGAGGACGCCCGCGAGTGGCGGTTAAGCACAGAAGAACCCTTATTCAAACCCAT    | 445 |
| at186 | AATATGGAGGACGCCCGCGAGTGGCGGTTAAGCACAGAAGAACCCTTATTCAAACCCAT    | 450 |
|       |                                                                |     |
| WT    | GTTCTTCGCCGGATGTGGATGATGACGAAGATACACACCAATCGATCGGAGGTCAAGG     | 515 |
| at152 | GTTCTTCGCCGGATGTGGATGATGACGAAGATACACACCAATCGATCGGAGGTCAAGG     | 535 |
| at162 | GTTCTTCGCCGGATGTGGATGATGACGAAGATACACACCAATCGATCGGAGGTCAAGG     | 505 |
| at186 | GTTCTTCGCCGGATGTGGATGATGACGAAGATACACACCAATCGATCGGAGGTCAAGG     | 510 |
|       |                                                                |     |
| WT    | CAAGCCTATAGGATGGGTCAAATGAGACCCTTATCCAGCGACGTGGATGTGGATGACATG   | 575 |
| at152 | CAAGCCTATAGGATGGGTCAAATGAGACCCTTATCCAGCGACGTGGATGTGGATGACATG   | 595 |
| at162 | CAAGCCTATAGGATGGGTCAAATGAGACCCTTATCCAGCGACGTGGATGTGGATGACATG   | 565 |
| at186 | CAAGCCTATAGGATGGGTCAAATGAGACCCTTATCCAGCGACGTGGATGTGGATGACATG   | 570 |
|       |                                                                |     |
| WT    | GATGTGGACCCGTTTCAGTAG                                          | 596 |
| at152 | GATGTGGACCCGTTTCAGTAG                                          | 616 |
| at162 | GATGTGGACCCGTTTCAGTAG                                          | 586 |
| at186 | GATGTGGACCCGTTTCAGTAG                                          | 591 |

**C**

|       |                                                             |     |
|-------|-------------------------------------------------------------|-----|
| WT    | GRKGHKTRRKVKVHSPVHPQIKAKLPKRDKRSTLRLPKINNSKVFHVNCKYKIRSRP   | 60  |
| at152 | GRKGHKRKLPLP*                                               | 15  |
| at162 | GRKGL*                                                      | 7   |
| at186 | GRKGHKES*                                                   | 11  |
|       |                                                             |     |
| WT    | MRRNQCNLATQCPHSHTVAIAPSVPLLHHVRRKVVHMPETVVMHMRMEDARRVAVKHRR | 120 |
| at152 | -----                                                       | 15  |
| at162 | -----                                                       | 7   |
| at186 | -----                                                       | 11  |
|       |                                                             |     |
| WT    | TLIQTHVSPDVEDDEDTHQIDRRSRQAYRMGQMRPLSSDVEDDMDVDFPQ          | 172 |
| at152 | -----                                                       | 15  |
| at162 | -----                                                       | 7   |
| at186 | -----                                                       | 11  |
