# Supplementary material for: A putative de novo evolved gene required for spermatid chromatin condensation in Drosophila melanogaster
Source: PubMed Central journal article supplement (PMC8445463; doi:10.1371/journal.pgen.1009787), 2021-09-03

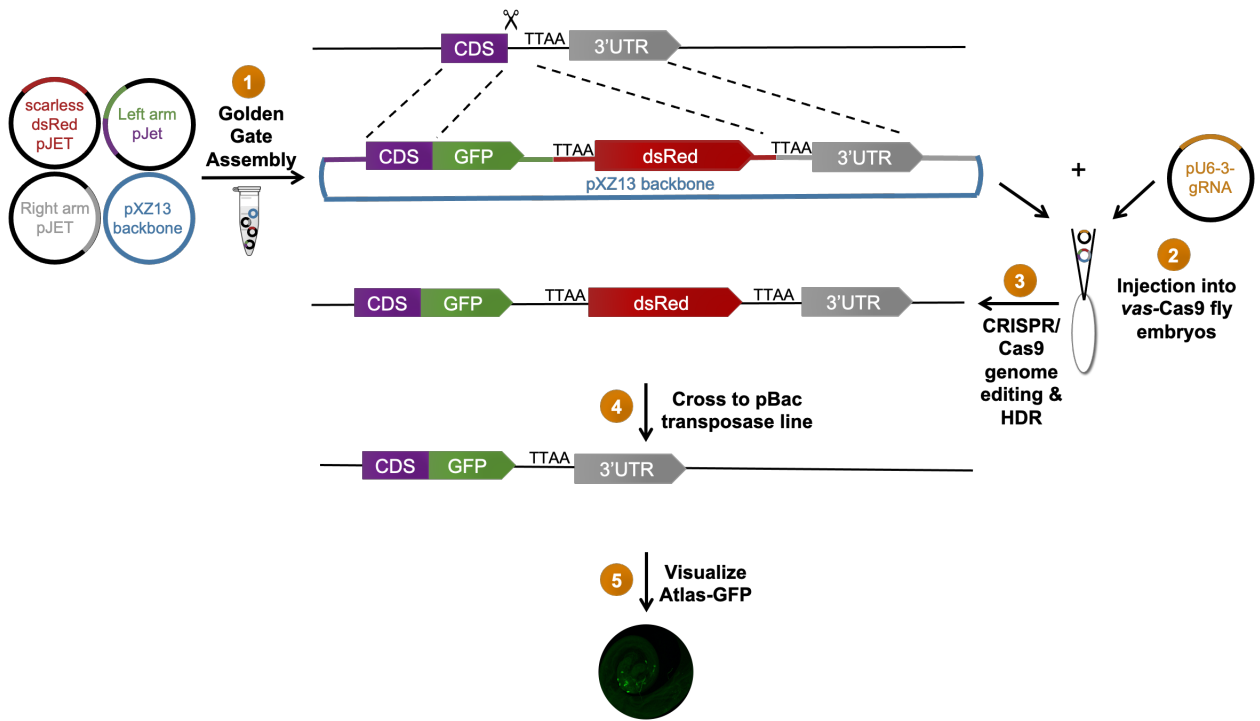

Supplement: pgen.1009787.s006.pdf [file pgen.1009787.s006.pdf]
