# Supplementary material for: A putative de novo evolved gene required for spermatid chromatin condensation in Drosophila melanogaster
Source: PubMed Central journal article supplement (PMC8445463; doi:10.1371/journal.pgen.1009787), 2021-09-03

*Dmel*  
+

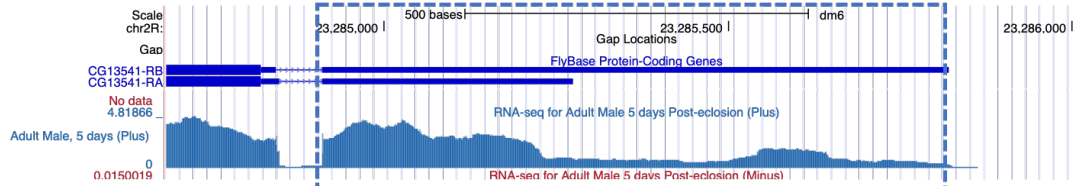

*Dsim*  
+

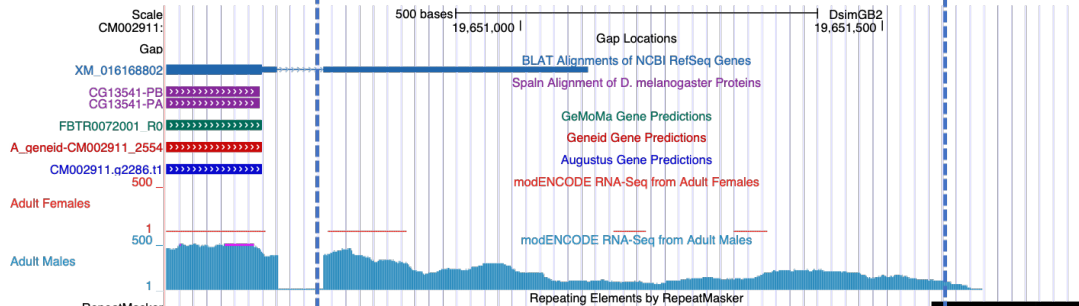

*Dsec*  
+

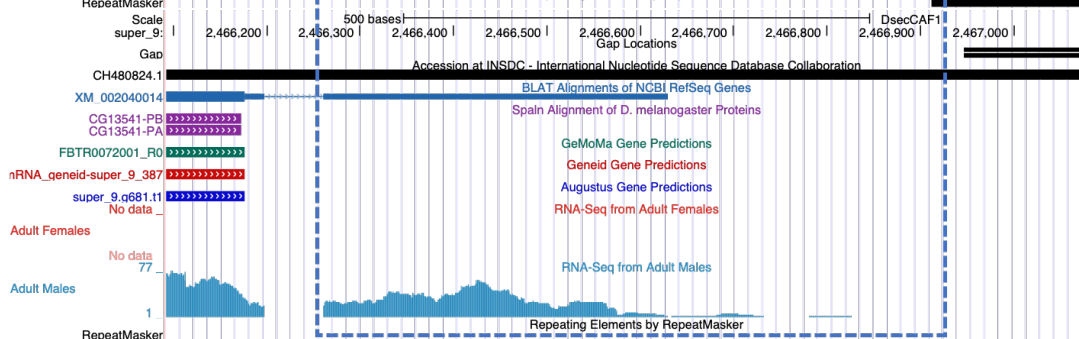

*Dmel*  
+

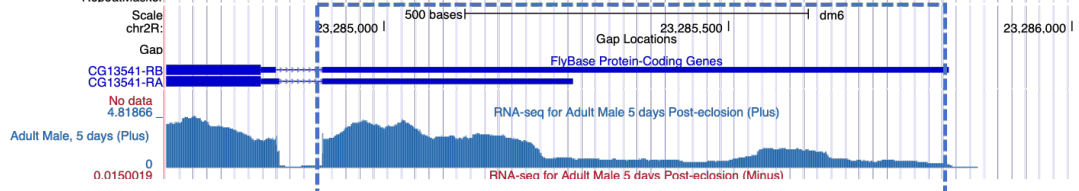

*Dyak*  
+

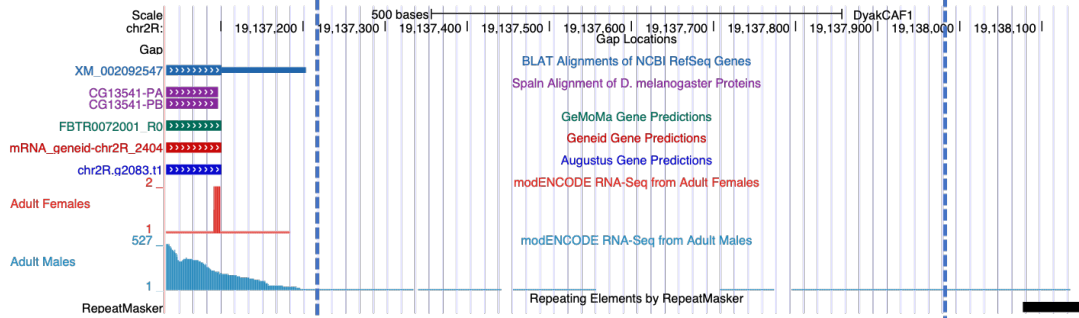

*Dere*  
+

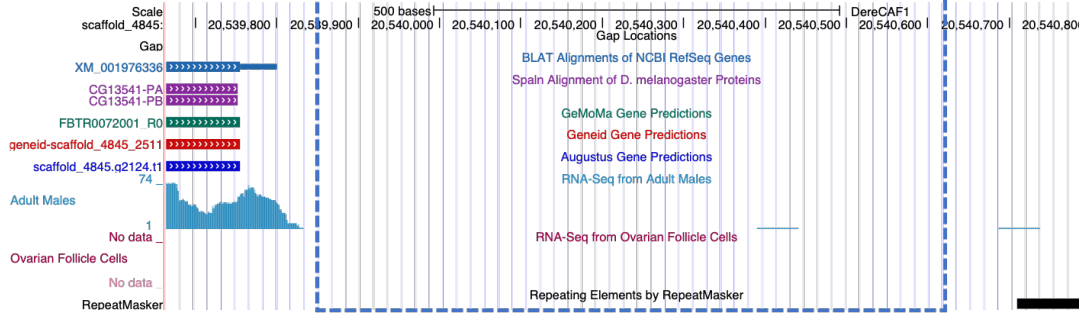

Dana

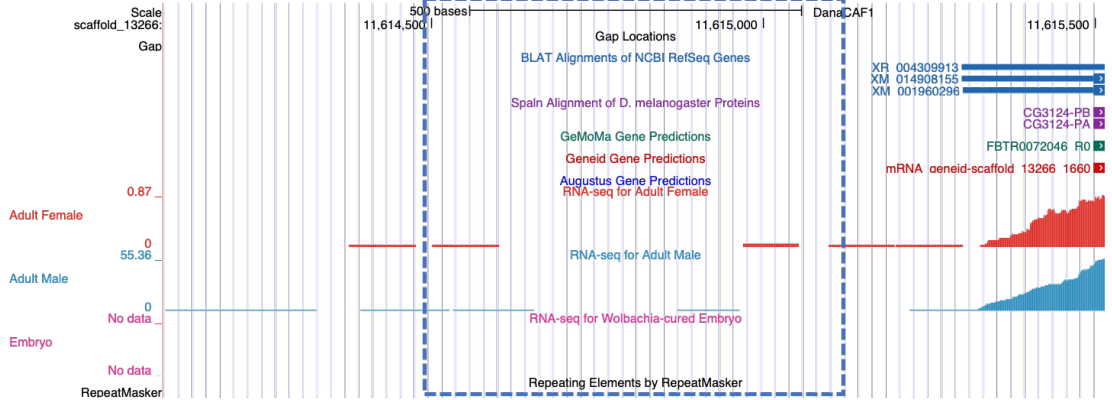

Dpse

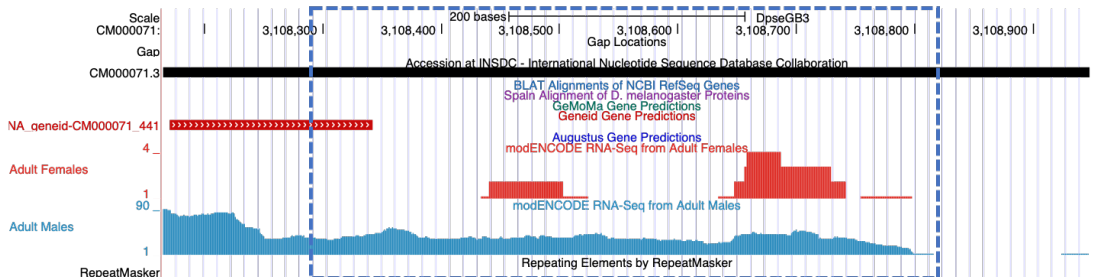

Dper

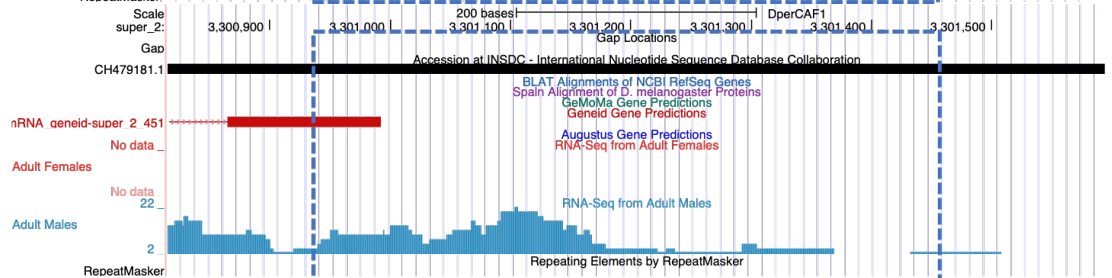

Dwil

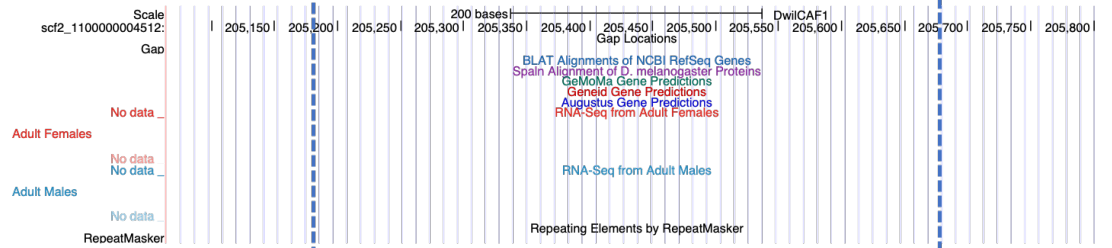

Dmoj

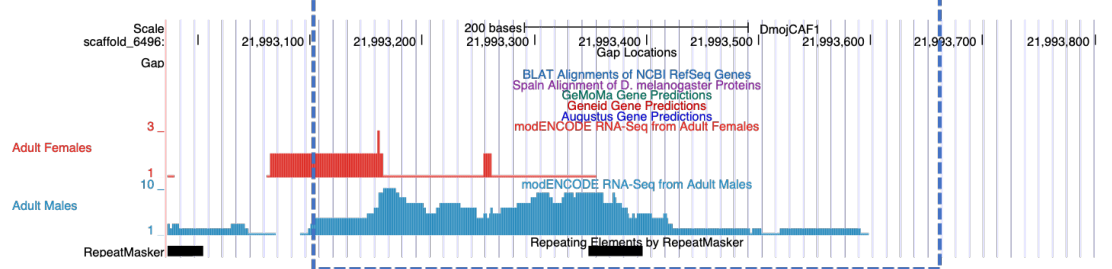

Dvir  
+

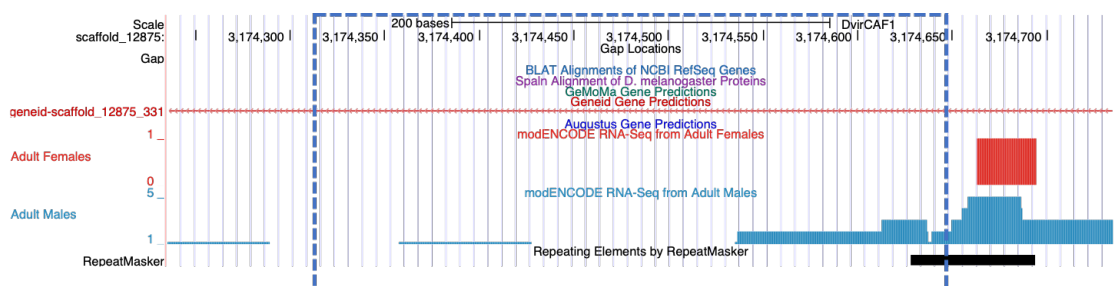

Dgri  
+

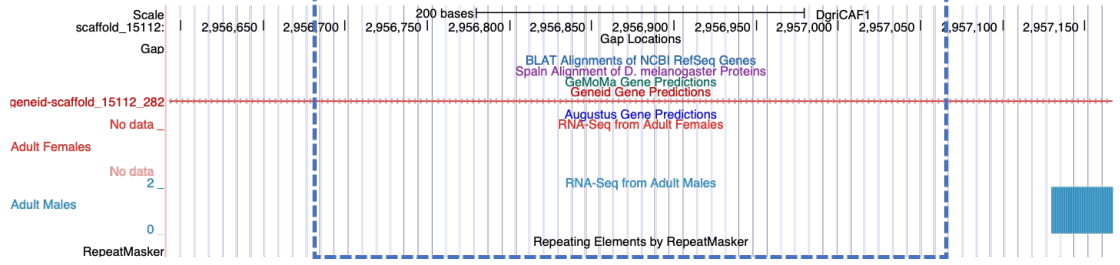

Supplement: pgen.1009787.s008.pdf [file pgen.1009787.s008.pdf]
