# Supplementary material for: A putative de novo evolved gene required for spermatid chromatin condensation in Drosophila melanogaster
Source: PubMed Central journal article supplement (PMC8445463; doi:10.1371/journal.pgen.1009787), 2021-09-03
Supplement: pgen.1009787.s011.pdf [file pgen.1009787.s011.pdf]

***Drosophila ananassae* or *virilis*:**

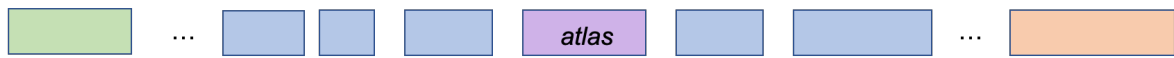

Scan in each direction until a gene with an identifiable homolog in target non-*Drosophila* species is found

**Target Dipteran genome:**

(green and orange homologs on separate contigs, indicating synteny breakdown):

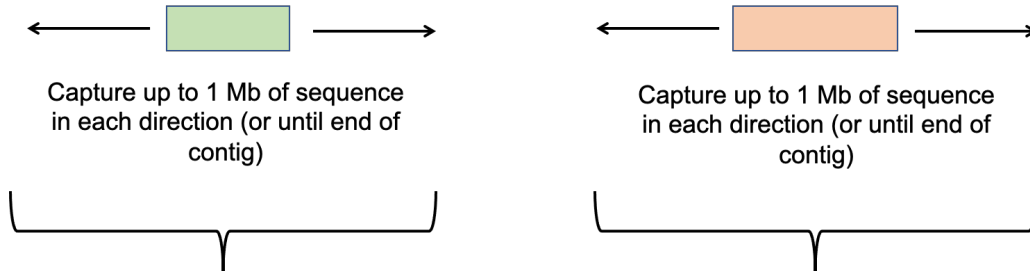

Search these regions using BLAST and Exonerate to look for any stretches of DNA with identity to either Atlas protein or *atlas* cDNA
