# Supplementary material for: A putative de novo evolved gene required for spermatid chromatin condensation in Drosophila melanogaster
Source: PubMed Central journal article supplement (PMC8445463; doi:10.1371/journal.pgen.1009787), 2021-09-03
Supplement: pgen.1009787.s012.pdf [file pgen.1009787.s012.pdf]

| <b>Sample</b> | <b>Normal round nuclear bundles</b> | <b>Normal early nuclear bundles</b> | <b>Normal late canoe nuclear bundles</b> | <b>Normal elongated nuclear bundles</b> | <b>Curled elongated nuclear bundles</b> | <b>Normal condensed nuclear bundles</b> | <b>Curled condensed nuclear bundles</b> | <b>% Curled nuclear bundles</b> |
|---------------|-------------------------------------|-------------------------------------|------------------------------------------|-----------------------------------------|-----------------------------------------|-----------------------------------------|-----------------------------------------|---------------------------------|
| WT 1          | 0                                   | 9                                   | 10                                       | 27                                      | 0                                       | 8                                       | 0                                       | 0%                              |
| WT 2          | 0                                   | 6                                   | 11                                       | 13                                      | 0                                       | 9                                       | 0                                       | 0%                              |
| WT 3          | 0                                   | 6                                   | 7                                        | 18                                      | 0                                       | 11                                      | 0                                       | 0%                              |
| WT 4          | 0                                   | 7                                   | 11                                       | 20                                      | 0                                       | 9                                       | 0                                       | 0%                              |
| WT 5          | 0                                   | 7                                   | 8                                        | 23                                      | 0                                       | 11                                      | 0                                       | 0%                              |
| WT 6          | 0                                   | 7                                   | 7                                        | 10                                      | 0                                       | 2                                       | 0                                       | 0%                              |
| WT 7          | 0                                   | 8                                   | 15                                       | 22                                      | 0                                       | 6                                       | 0                                       | 0%                              |
| WT 8          | 0                                   | 8                                   | 9                                        | 6                                       | 0                                       | 0                                       | 0                                       | 0%                              |
| WT 9          | 0                                   | 11                                  | 11                                       | 27                                      | 0                                       | 12                                      | 0                                       | 0%                              |
| WT 10         | 1                                   | 11                                  | 9                                        | 19                                      | 0                                       | 11                                      | 0                                       | 0%                              |
| Null 1        | 0                                   | 12                                  | 13                                       | 0                                       | 17                                      | 0                                       | 8                                       | 50%                             |
| Null 2        | 0                                   | 6                                   | 16                                       | 0                                       | 8                                       | 0                                       | 18                                      | 54%                             |
| Null 3        | 0                                   | 14                                  | 12                                       | 0                                       | 6                                       | 0                                       | 3                                       | 26%                             |
| Null 4        | 0                                   | 12                                  | 12                                       | 0                                       | 12                                      | 0                                       | 13                                      | 51%                             |
| Null 5        | 0                                   | 6                                   | 23                                       | 0                                       | 9                                       | 0                                       | 24                                      | 53%                             |
| Null 6        | 0                                   | 2                                   | 8                                        | 0                                       | 5                                       | 0                                       | 27                                      | 76%                             |
| Null 7        | 0                                   | 0                                   | 0                                        | 0                                       | 3                                       | 0                                       | 23                                      | 100%                            |
| Null 8        | 0                                   | 5                                   | 7                                        | 0                                       | 9                                       | 0                                       | 19                                      | 70%                             |
| Null 9        | 0                                   | 5                                   | 7                                        | 0                                       | 10                                      | 0                                       | 17                                      | 69%                             |
| Null 10       | 0                                   | 6                                   | 9                                        | 0                                       | 10                                      | 0                                       | 13                                      | 60%                             |
