# Supplementary material for: A putative de novo evolved gene required for spermatid chromatin condensation in Drosophila melanogaster
Source: PubMed Central journal article supplement (PMC8445463; doi:10.1371/journal.pgen.1009787), 2021-09-03
Supplement: pgen.1009787.s013.pdf [file pgen.1009787.s013.pdf]

| Species                 | Length (a.a.)                                      | Isoelectric Point (pI) | Pairwise BLASTP bit score and e-value with Dmel | Note(s)                                                                                                                                                                                                                                                                                                                                                                                  |
|-------------------------|----------------------------------------------------|------------------------|-------------------------------------------------|------------------------------------------------------------------------------------------------------------------------------------------------------------------------------------------------------------------------------------------------------------------------------------------------------------------------------------------------------------------------------------------|
| <i>D. melanogaster</i>  | 172                                                | 10.7                   | 347, 3e-129                                     |                                                                                                                                                                                                                                                                                                                                                                                          |
| <i>D. simulans</i>      | 172                                                | 10.6                   | 281, 1e-103                                     |                                                                                                                                                                                                                                                                                                                                                                                          |
| <i>D. sechellia</i>     | 172                                                | 10.6                   | 293, 7e-108                                     |                                                                                                                                                                                                                                                                                                                                                                                          |
| <i>D. yakuba</i>        | 178                                                | 11.4                   | 219, 9e-79                                      |                                                                                                                                                                                                                                                                                                                                                                                          |
| <i>D. erecta</i>        | 174                                                | 11.0                   | 210, 2e-75                                      |                                                                                                                                                                                                                                                                                                                                                                                          |
| <i>D. ananassae</i>     | 170                                                | 10.3                   | 78, 2e-23                                       |                                                                                                                                                                                                                                                                                                                                                                                          |
| <i>D. bipectinata</i>   | 233                                                | 10.3                   | 62, 9e-11                                       | Likely contains an ortholog, given significant BLAST hit and RNAseq evidence of male-specific expression, but gene boundaries are unclear. The 5' end of the ORF contains either ~100 extra codons or an intron, neither of which matches the <i>atlas</i> gene structure. Statistics reported at left are for the gene model that includes an intron, GenBank accession XP_017110044.1. |
| <i>D. elegans</i>       | 171                                                | 10.4                   | 142, 2e-48                                      |                                                                                                                                                                                                                                                                                                                                                                                          |
| <i>D. ficusphila</i>    | 180                                                | 10.6                   | 147, 2e-50                                      |                                                                                                                                                                                                                                                                                                                                                                                          |
| <i>D. eugracilis</i>    | 176                                                | 10.9                   | 138, 8e-47                                      |                                                                                                                                                                                                                                                                                                                                                                                          |
| <i>D. kikkawai</i>      | No ortholog detected at mel or ana syntenic region |                        |                                                 |                                                                                                                                                                                                                                                                                                                                                                                          |
| <i>D. serrata</i>       | No ortholog detected at mel or ana syntenic region |                        |                                                 |                                                                                                                                                                                                                                                                                                                                                                                          |
| <i>D. rhopaloa</i>      | 176                                                | 10.7                   | 149, 4e-51                                      |                                                                                                                                                                                                                                                                                                                                                                                          |
| <i>D. biarmipes</i>     | 185                                                | 10.4                   | 158, 1e-54                                      |                                                                                                                                                                                                                                                                                                                                                                                          |
| <i>D. sukukii</i>       | 179                                                | 10.6                   | 182, 5e-64                                      |                                                                                                                                                                                                                                                                                                                                                                                          |
| <i>D. takahashii</i>    | 198                                                | 10.6                   | 165, 4e-57                                      |                                                                                                                                                                                                                                                                                                                                                                                          |
| <i>D. obscura</i>       | No ortholog detected                               |                        |                                                 |                                                                                                                                                                                                                                                                                                                                                                                          |
| <i>D. miranda</i>       | No ortholog detected                               |                        |                                                 |                                                                                                                                                                                                                                                                                                                                                                                          |
| <i>D. persimilis</i>    | >198                                               | ~10.3                  | n.s.                                            | Found in syntenic region to <i>D. virilis</i> ortholog, but BLAST results do not support orthology; gap in <i>D. persimilis</i> assembly cuts off 3' end of predicted ORF, so length and pI values are estimates                                                                                                                                                                         |
| <i>D. pseudoobscura</i> | 232                                                | 10.1                   | n.s.                                            |                                                                                                                                                                                                                                                                                                                                                                                          |
| <i>D. willistoni</i>    | No ortholog detected                               |                        |                                                 |                                                                                                                                                                                                                                                                                                                                                                                          |
| <i>D. busckii</i>       | 88                                                 | 5.1                    | 34.3, 4e-8                                      | Found in syntenic region to <i>D. virilis</i> ortholog, but low pI does not support homologous function                                                                                                                                                                                                                                                                                  |
| <i>D. hydei</i>         | No ortholog detected                               |                        |                                                 |                                                                                                                                                                                                                                                                                                                                                                                          |
| <i>D. arizonae</i>      | No ortholog detected                               |                        |                                                 |                                                                                                                                                                                                                                                                                                                                                                                          |
| <i>D. mojavensis</i>    | No ortholog detected                               |                        |                                                 |                                                                                                                                                                                                                                                                                                                                                                                          |
| <i>D. navojoa</i>       | No ortholog detected                               |                        |                                                 |                                                                                                                                                                                                                                                                                                                                                                                          |
| <i>D. virilis</i>       | 116                                                | 10.1                   | 40, 1e-9                                        |                                                                                                                                                                                                                                                                                                                                                                                          |
| <i>D. grimshawi</i>     | No ortholog detected                               |                        |                                                 |                                                                                                                                                                                                                                                                                                                                                                                          |
