# Supplementary material for: A putative de novo evolved gene required for spermatid chromatin condensation in Drosophila melanogaster
Source: PubMed Central journal article supplement (PMC8445463; doi:10.1371/journal.pgen.1009787), 2021-09-03
Supplement: pgen.1009787.s015.pdf [file pgen.1009787.s015.pdf]

**atlas-HA**

Atlas Rescue F1: GGCATGTCGACCTCGAGTACCCGGGAGCTCGAATTCTAGAcctgaaagcagaacattgta  
Atlas Rescue R1: ATGGGTAAAAGATGCGGCCTCCACCGCGGTGGAGATCCATctgaaacgggtccacatcca  
Atlas Rescue F2: ATGGATCTCCACCGCGGTGGAGGCCGCA  
Atlas Rescue R2: AATTACCACAGTACCTACAATATATTTCCAACACACATCctcacgtggaccggtgtccgc  
Atlas Rescue F3: ggatgtgtgtggaaatatattgtaggtactgtggttaattgtttaacttctcgttacaaaatg  
Atlas Rescue F4: ATTGCCGGCGATATCGGATCCACCGGTGCCTAGGCGCGCCgcgaccgcgcaaaactcat

**atlas-GFP**

*Cloning of atlas CDS into pENTR prior to recombination with pTWG to form atlas-GFP:*

pENTR-atl-F: caccATGGGACGCAAAGGCCACAAG  
pENTR-atl-R-nostop: CTGAAACGGGTCCACATCCATG

*Amplification of homology arms for Golden Gate Assembly of scarless CRISPR HDR plasmid:*

Left arm F: cgtctcaggacATGGGACGCAAAGGCCACAAG

Left arm R:

cgtctcaTTAAACAATTACCACAGTACCTACAATATATTTCCAACACACATCgTCACGTGGACCGGTGCTT  
GTAC

Right arm F: cgtctcaagggTTAACTTCTCGTTTACAAAATGCC

Right arm R: cgtctcagcatTTGGCGTGGGACTCATTTTGGC
